# Supplementary material for: Dealloying layered PdBi2 nanoflakes to palladium hydride leads to enhanced electrocatalytic N2 reduction
Source: Royal Society of Chemistry journal article supplement (doi:10.1039/d1ta07395h), 2022-01-01
Supplement: d1ta07395h1.pdf [file d1ta07395h1.pdf]

## Supporting Information

# Dealloying PdBi<sub>2</sub> Nanoflakes to Palladium Hydride Leads to Enhanced Electrocatalytic N<sub>2</sub> Reduction

*Nikolas Antonatos<sup>1,\*</sup>, Joshua D. Elliott<sup>2</sup>, Vlastimil Mazánek<sup>1</sup>, Petr Marvan<sup>1</sup>, Paola Carbone<sup>2</sup>,  
Weixiang Geng<sup>3</sup>, Yu Jing<sup>3</sup>, Zdeněk Sofer<sup>1,\*</sup>*

<sup>1</sup> Department of Inorganic Chemistry, University of Chemistry and Technology Prague, Technická 5, 166 28 Prague 6, Czech Republic; e-mail: zdenek.sofer@vscht.cz ; nikolaoa@vscht.cz

<sup>2</sup> Department of Chemical Engineering and Analytical Science, University of Manchester, Manchester M13 9PL, United Kingdom

<sup>3</sup> Jiangsu Co-Innovation Centre of Efficient Processing and Utilization of Forest Resources, International Innovation Center for Forest Chemicals and Materials, College of Chemical Engineering, Nanjing Forestry University, Nanjing 210037, China

**Table S1.** The complete spectrum of Raman active mode frequencies and symmetries computed from PBE-SOC DFPT simulations of  $\alpha$ -PdBi<sub>2</sub>.

| Frequency (cm <sup>-1</sup> ) | Symmetry | Frequency (cm <sup>-1</sup> ) | Symmetry |
|-------------------------------|----------|-------------------------------|----------|
| 16.2                          | $A_g$    | 75.5                          | $A_g$    |
| 20.3                          | $B_g$    | 79.0                          | $A_g$    |
| 34.0                          | $A_g$    | 96.5                          | $A_g$    |
| 44.6                          | $B_g$    | 116.9                         | $A_g$    |
| 44.8                          | $A_g$    | 120.6                         | $A_g$    |
| 63.7                          | $A_g$    | 127.1                         | $B_g$    |
| 64.1                          | $A_g$    | 127.6                         | $A_g$    |
| 68.3                          | $B_g$    | 147.8                         | $A_g$    |
| 69.9                          | $B_g$    | 158.3                         | $B_g$    |

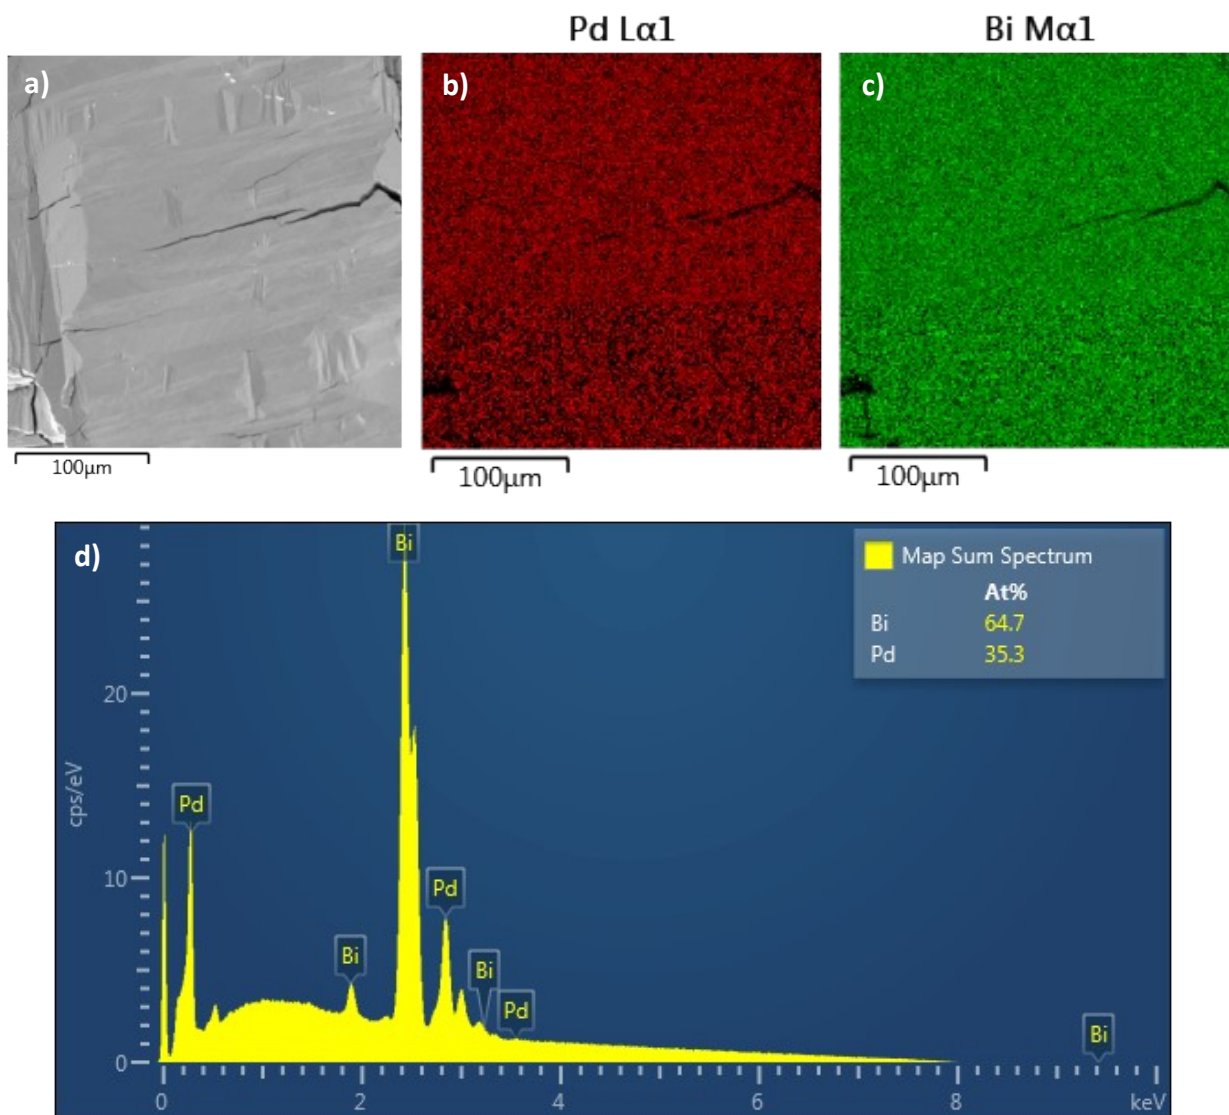

**Figure S1.** **a)** SEM image of bulk PdBi<sub>2</sub> with the corresponding EDS elemental maps of **b)** palladium and **c)** bismuth. **d)** EDS map spectrum of PdBi<sub>2</sub> depicting the ratio of Pd:Bi at 1:2.

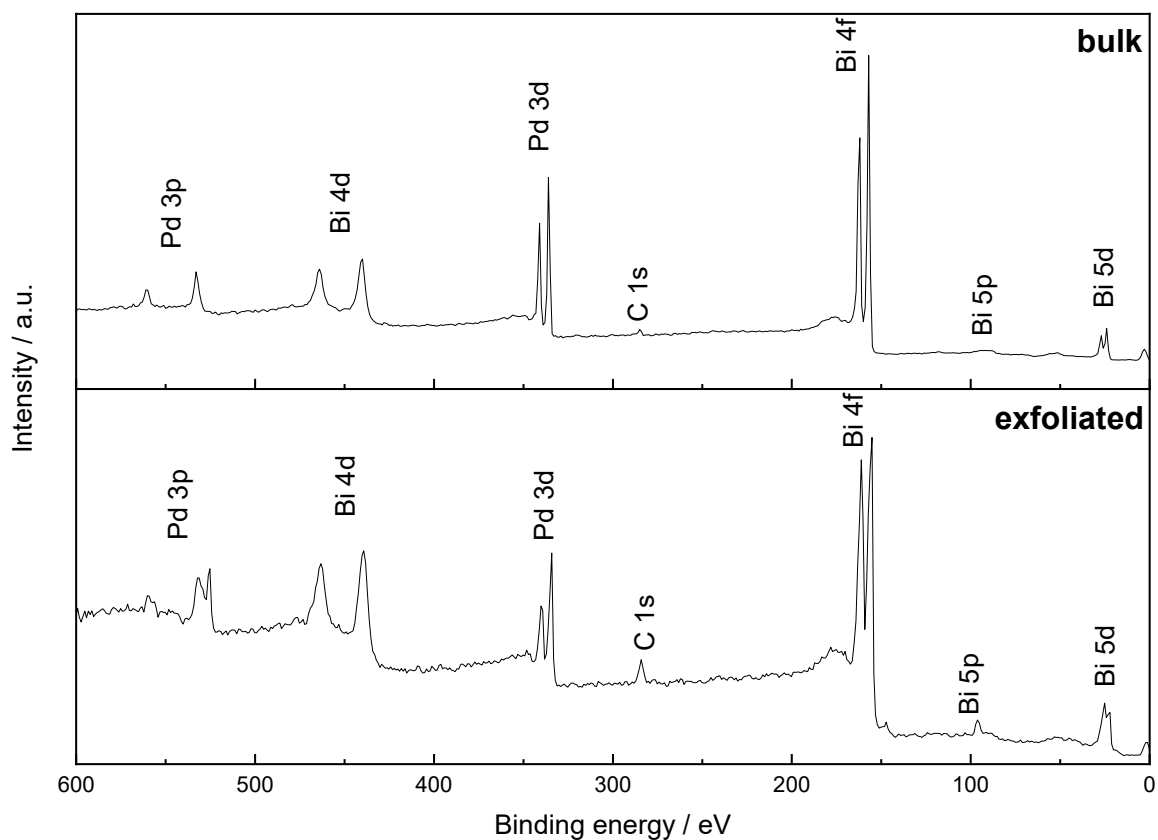

**Figure S2.** Wide survey XPS spectra of bulk and exfoliated PdBi<sub>2</sub>.

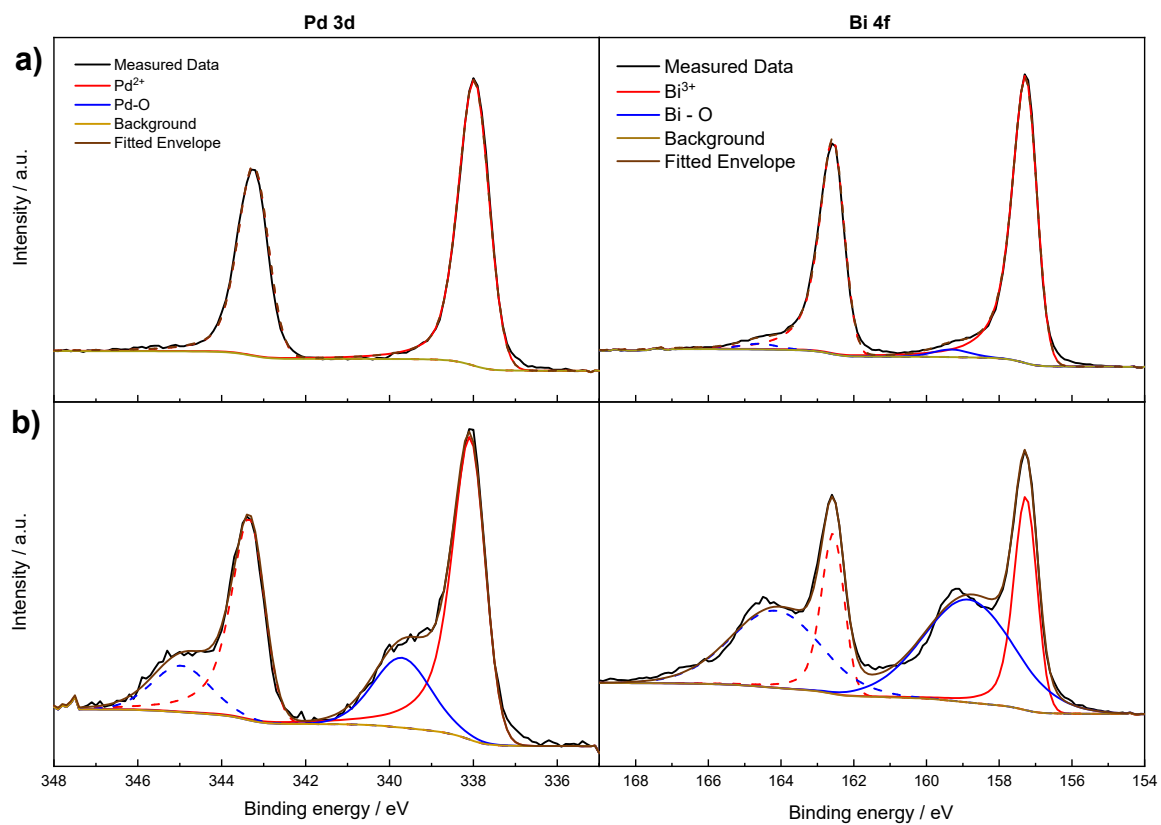

**Figure S3.** High-resolution XPS spectra of Pd 3d and Bi 4f of **a)** bulk and **b)** exfoliated PdBi<sub>2</sub>.



**Table S2.** Ammonia formation rates and Faradaic efficiencies of exfoliated PdBi<sub>2</sub> nanoflakes at different potentials.

| Potential vs. Ag/AgCl / V | NH <sub>3</sub> yield / $\mu\text{g cm}^{-2} \text{h}^{-1}$ | Faradaic efficiency |
|---------------------------|-------------------------------------------------------------|---------------------|
| -1.4                      | 4.33                                                        | 3.16                |
| -1.5 (1)                  | 24.20                                                       | 4.71                |
| -1.5 (2)                  | 20.38                                                       | 4.08                |
| -1.5 (3)                  | 22.17                                                       | 4.30                |
| <b>-1.5 average</b>       | $22.25 \pm 1.56$                                            | $4.36 \pm 0.26$     |
| -1.6 (1)                  | 28.03                                                       | 2.39                |
| -1.6 (2)                  | 26.75                                                       | 2.01                |
| <b>-1.6 average</b>       | $27.39 \pm 0.64$                                            | $2.20 \pm 0.19$     |
| -1.7 (1)                  | 29.81                                                       | 0.66                |
| -1.7 (2)                  | 28.28                                                       | 0.61                |
| <b>-1.7 average</b>       | $29.04 \pm 0.76$                                            | $0.64 \pm 0.03$     |

**Table S3.** Ammonia formation rates and Faradaic efficiencies of exfoliated PdBi<sub>2</sub> nanoflakes after each NRR cycle at -1.5 V vs. Ag/AgCl.

| Cycle number | NH <sub>3</sub> yield / $\mu\text{g cm}^{-2} \text{h}^{-1}$ | Faradaic efficiency |
|--------------|-------------------------------------------------------------|---------------------|
| 1            | 23.44                                                       | 4.52                |
| 2            | 25.99                                                       | 7.37                |
| 3            | 30.32                                                       | 14.87               |
| 4            | 28.53                                                       | 13.88               |
| 5            | 31.34                                                       | 16.98               |

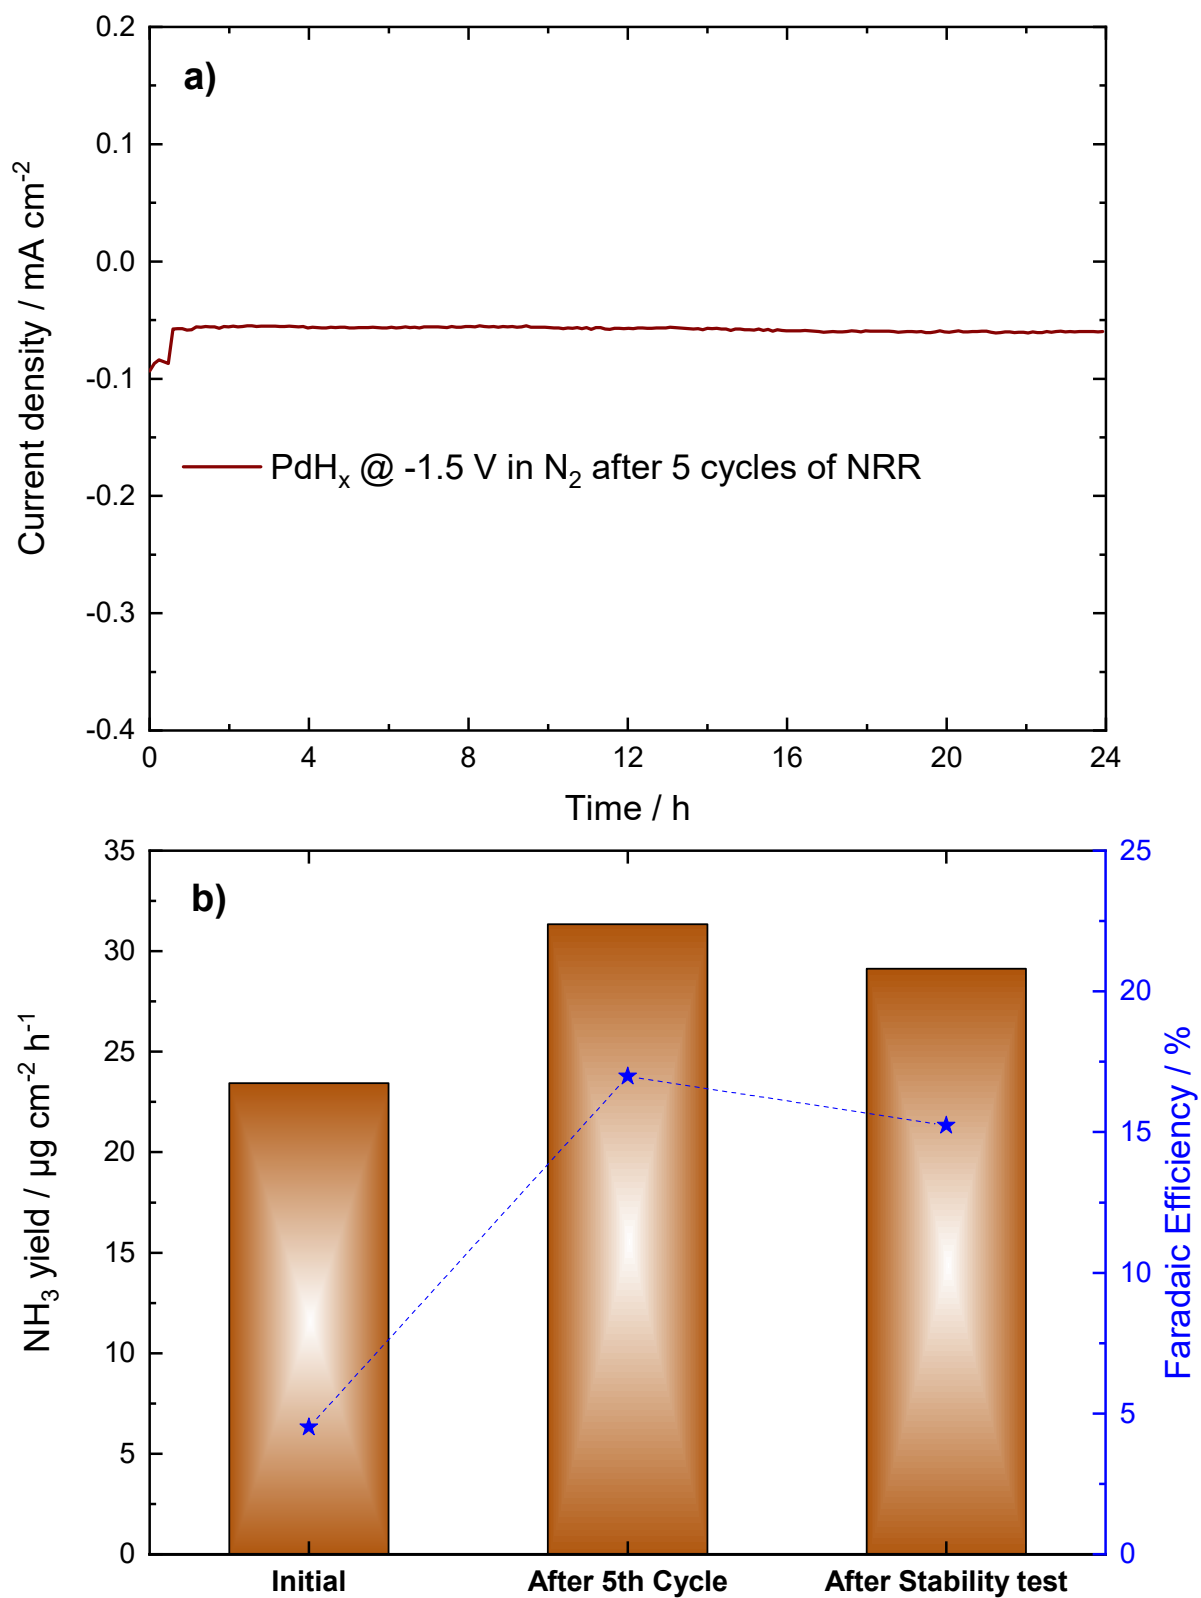

**Figure S4. a)** Long-term chronoamperometry curve of PdH<sub>x</sub> showing good stability. **b)** NH<sub>3</sub> yield and FE for initial, after 5 cycles of NRR and post-stability test NRR (after 24 h) of PdBi<sub>2</sub> at -1.5 V vs. Ag/AgCl.

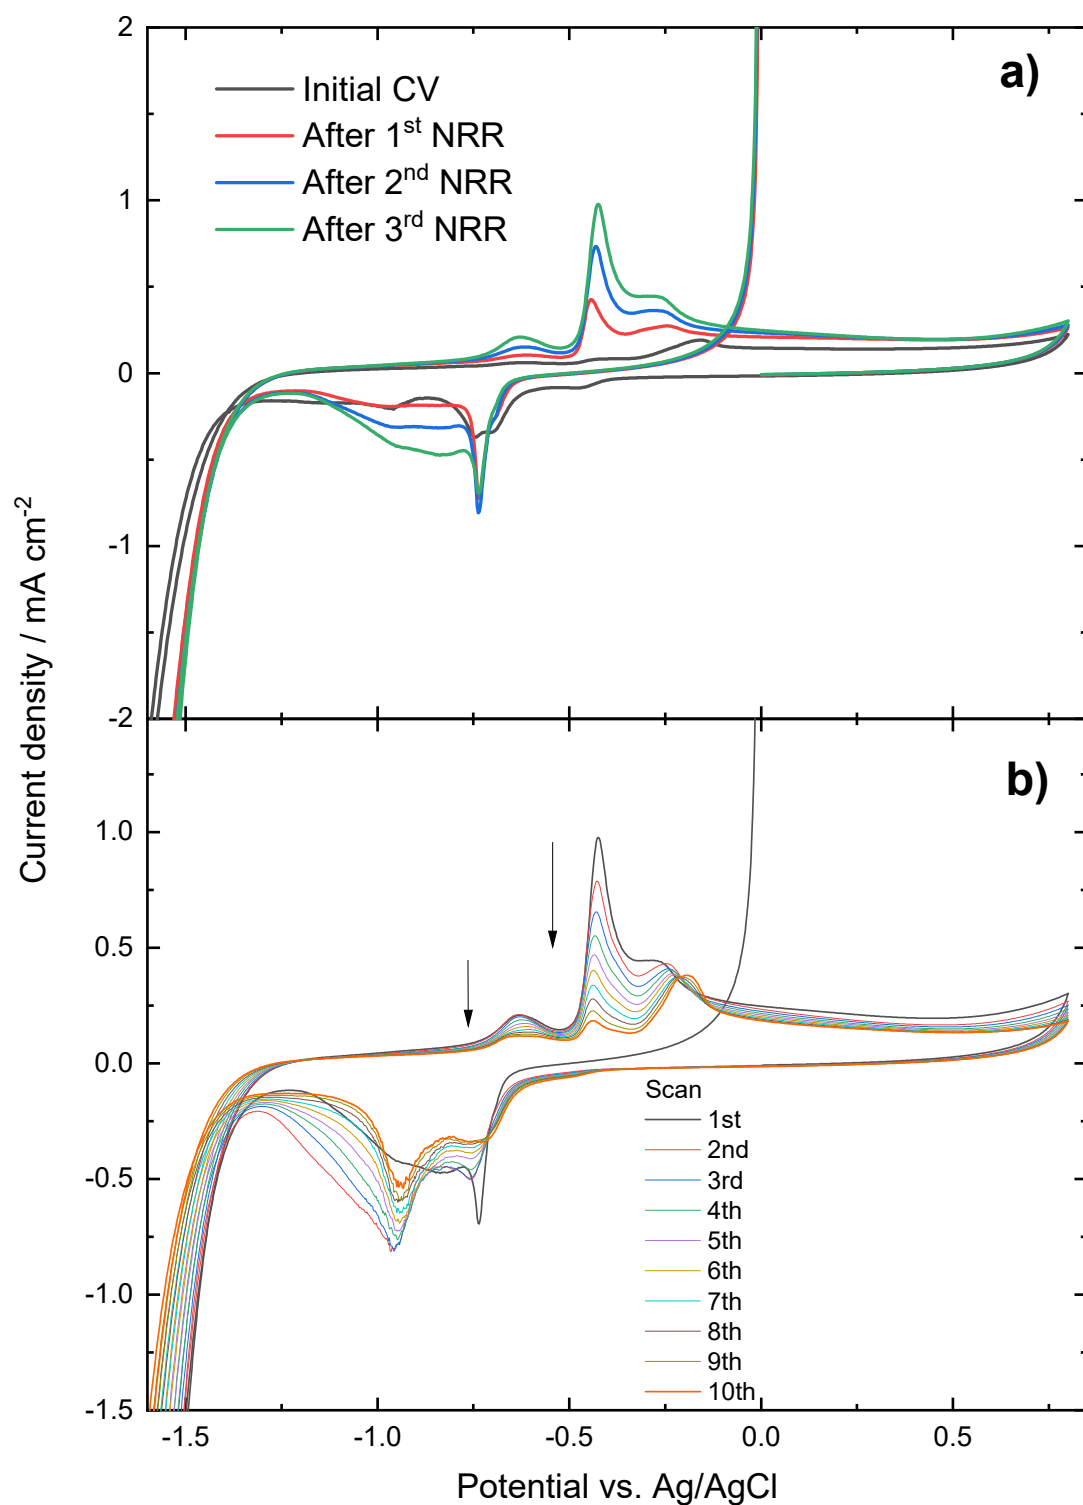

**Figure S5. a)** First CV of PdBi<sub>2</sub>, before any catalysis and after one, two and three NRR cycles. **b)** Ten consecutive CVs of PdBi<sub>2</sub>, after three cycles of NRR. Scan rate: 100 mV s<sup>-1</sup>.



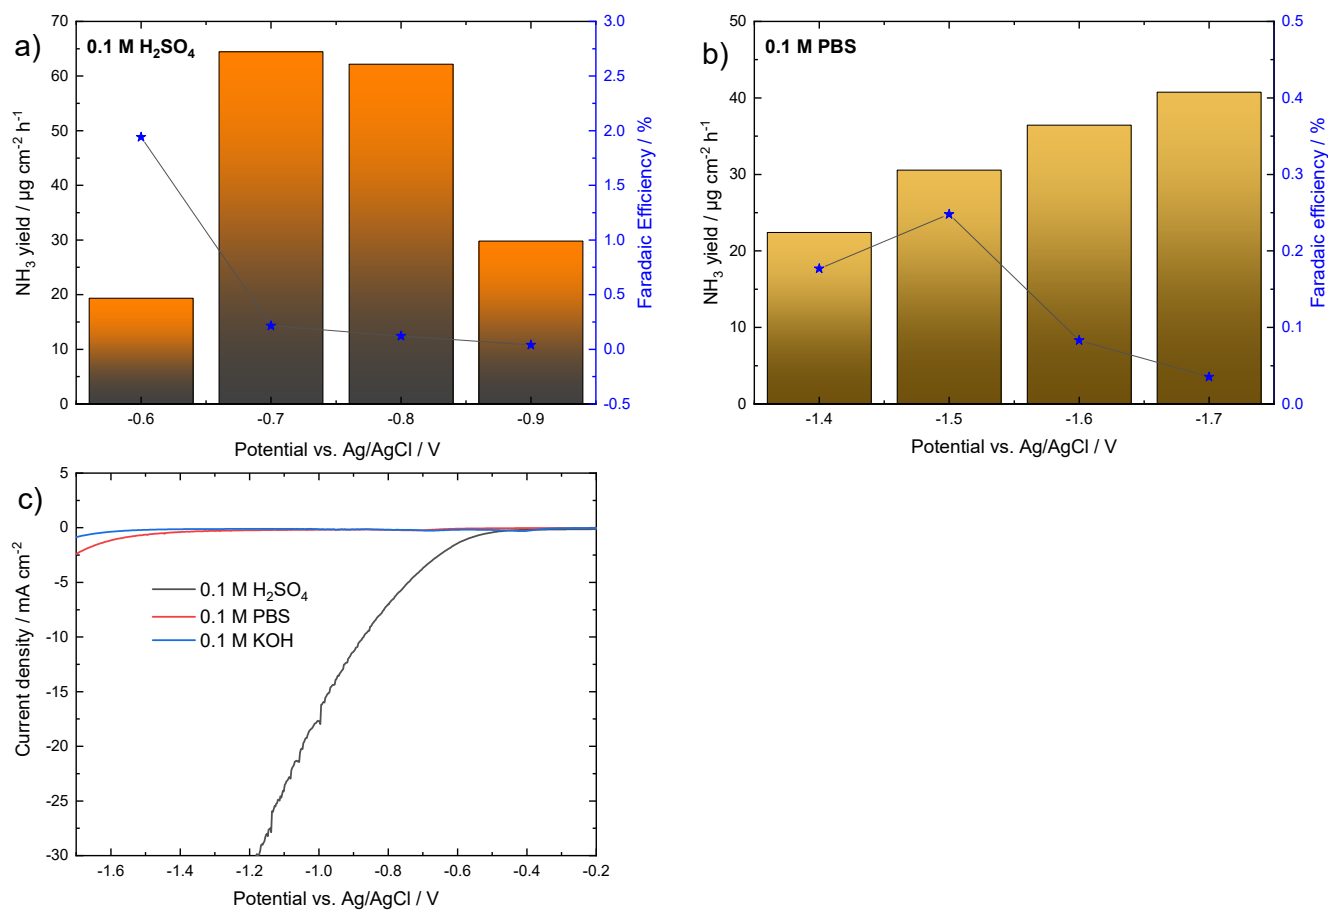

**Figure S6.** NH<sub>3</sub> formation rate of PdBi<sub>2</sub> with corresponding Faradaic efficiency in **a)** acidic environment (0.1 M H<sub>2</sub>SO<sub>4</sub>, pH = 1) and **b)** neutral environment (0.1 M PBS, pH = 7). **c)** LSV curves of PdBi<sub>2</sub> in different electrolytes. Scan rate: 100 mV s<sup>-1</sup>.

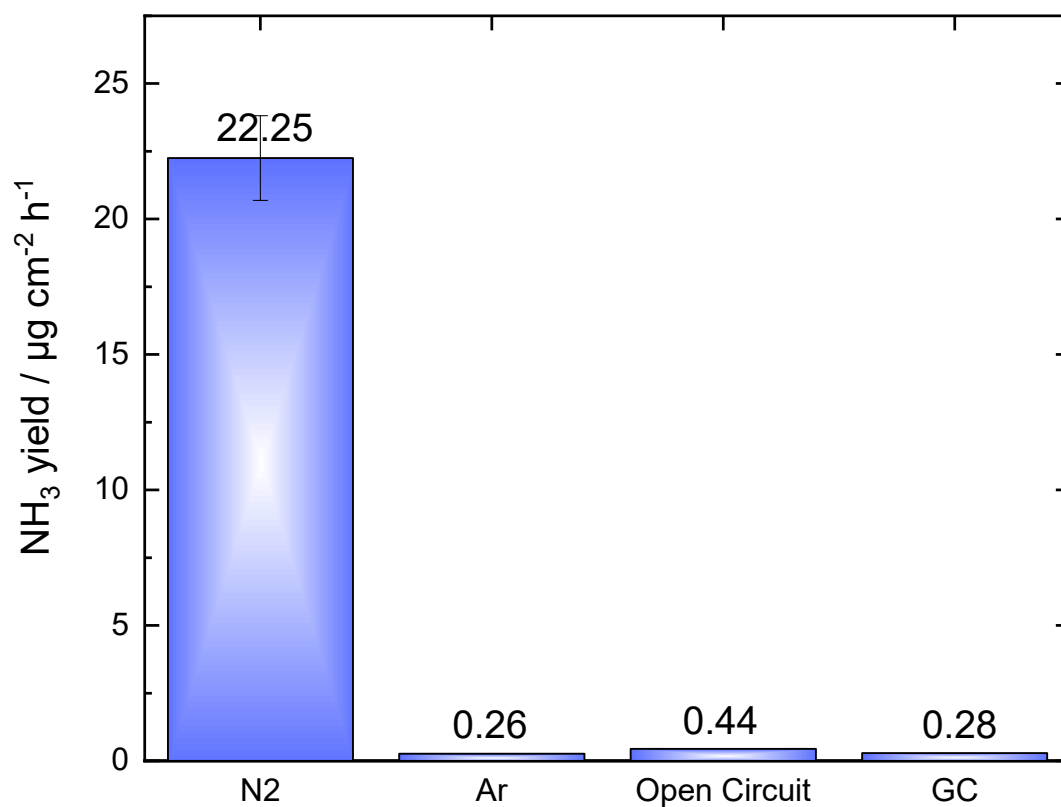

**Figure S7.** NH<sub>3</sub> yield comparison in 0.1 M KOH between: PdBi<sub>2</sub> in saturated N<sub>2</sub> at -1.5 V, PdBi<sub>2</sub> in saturated Ar at -1.5 V, PdBi<sub>2</sub> in saturated N<sub>2</sub> at OCP and bare GC in saturated N<sub>2</sub> at -1.5 V.

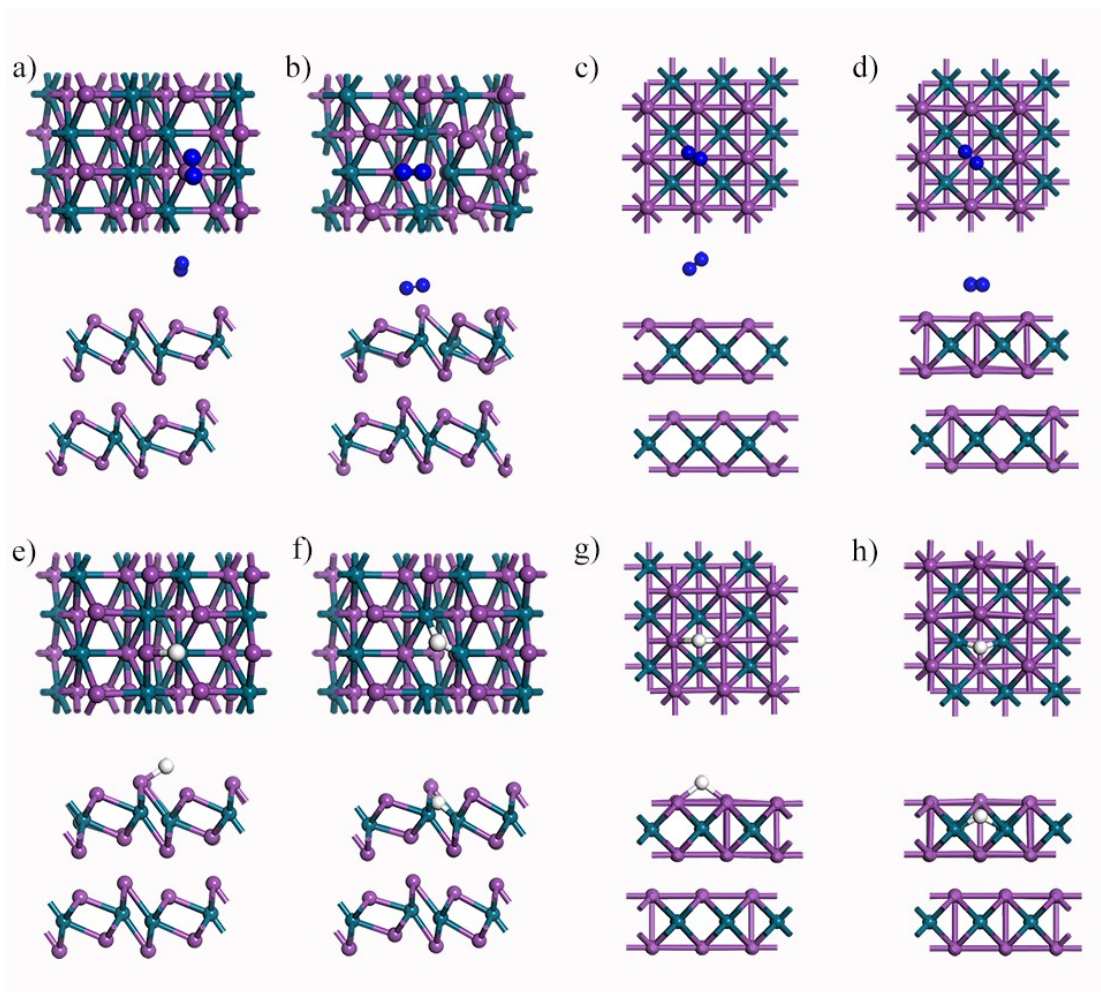

**Figure S8.** Schematics from the top and side views for the adsorption of H and N<sub>2</sub> on different phases of PdBi<sub>2</sub> without or with Bi vacancies. (a)  $\alpha$ -PdBi<sub>2</sub>-N<sub>2</sub>, (b)  $\alpha$ -PdBi<sub>2</sub>-v-N<sub>2</sub>, (c)  $\beta$ -PdBi<sub>2</sub>-N<sub>2</sub>, (d)  $\beta$ -PdBi<sub>2</sub>-v-N<sub>2</sub>, (e)  $\alpha$ -PdBi<sub>2</sub>-H, (f)  $\alpha$ -PdBi<sub>2</sub>-v-H, (g)  $\beta$ -PdBi<sub>2</sub>-H and (h)  $\beta$ -PdBi<sub>2</sub>-v-H.

**Table S4.** The adsorption energy ( $E_{ad}$ ) and distance ( $D_{ad-M}$ ) between the adsorbed species and the adsorption site of  $\alpha$ -PdBi<sub>2</sub>,  $\alpha$ -PdBi<sub>2</sub>-v,  $\beta$ -PdBi<sub>2</sub> and  $\beta$ -PdBi<sub>2</sub>-v.

|                                        | $\alpha$ -PdBi <sub>2</sub> | $\alpha$ -PdBi <sub>2</sub> -v | $\beta$ -PdBi <sub>2</sub> | $\beta$ -PdBi <sub>2</sub> -v |
|----------------------------------------|-----------------------------|--------------------------------|----------------------------|-------------------------------|
| $E_{ad}(\text{H}) / \text{eV}$         | 0.50                        | 0.25                           | 0.75                       | 0.29                          |
| $E_{ad}(\text{N}_2) / \text{eV}$       | -0.08                       | -0.17                          | -0.09                      | -0.15                         |
| $D_{\text{H-M}} / \text{\AA}$          | 1.89                        | 1.77                           | 2.13                       | 1.78                          |
| $D_{\text{N}_2\text{-M}} / \text{\AA}$ | 3.93                        | 3.80                           | 3.89                       | 3.73                          |

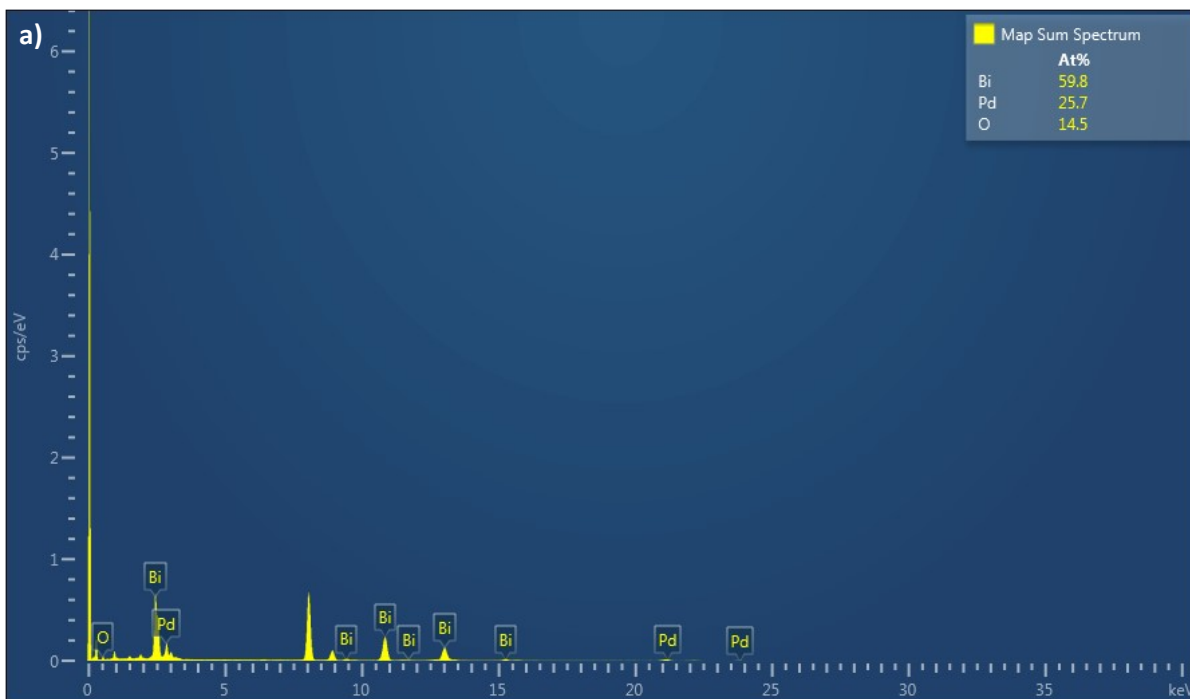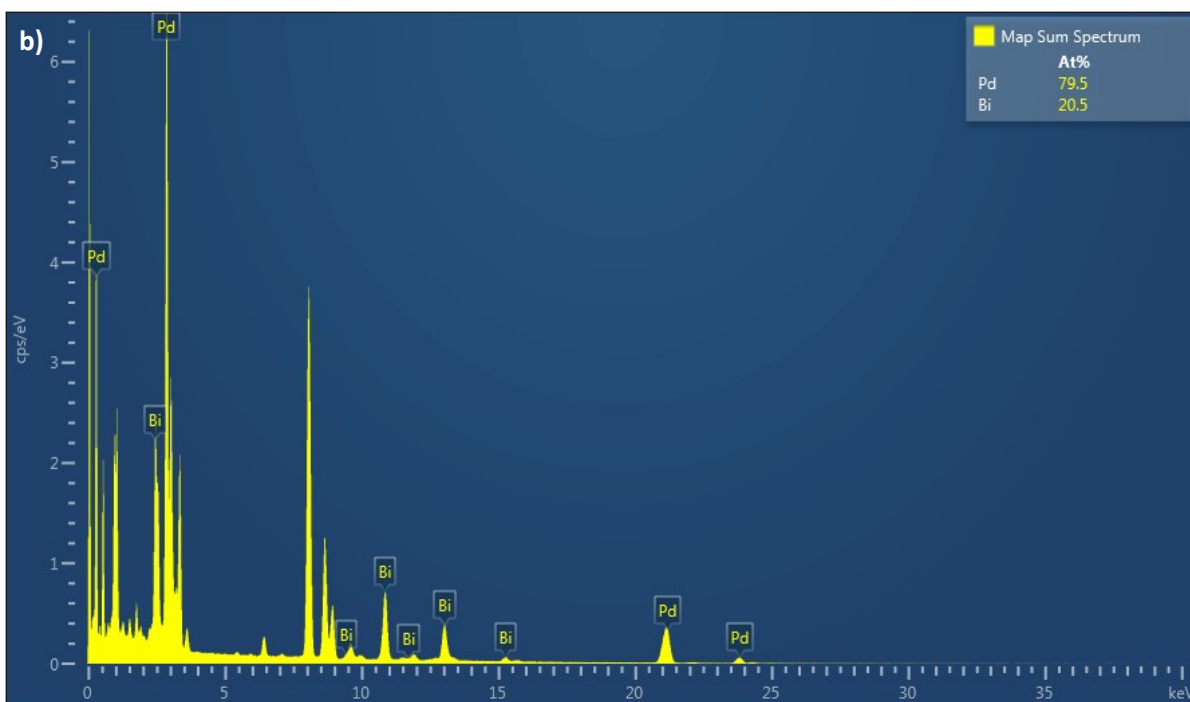

**Figure S9.** TEM/EDS map spectra of exfoliated PdBi<sub>2</sub> flakes **a)** before and **b)** after NRR depicting the change of Pd:Bi ratio from 1:2 to 4:1. Peaks appearing around 8 keV are due to the Cu of the TEM grids.

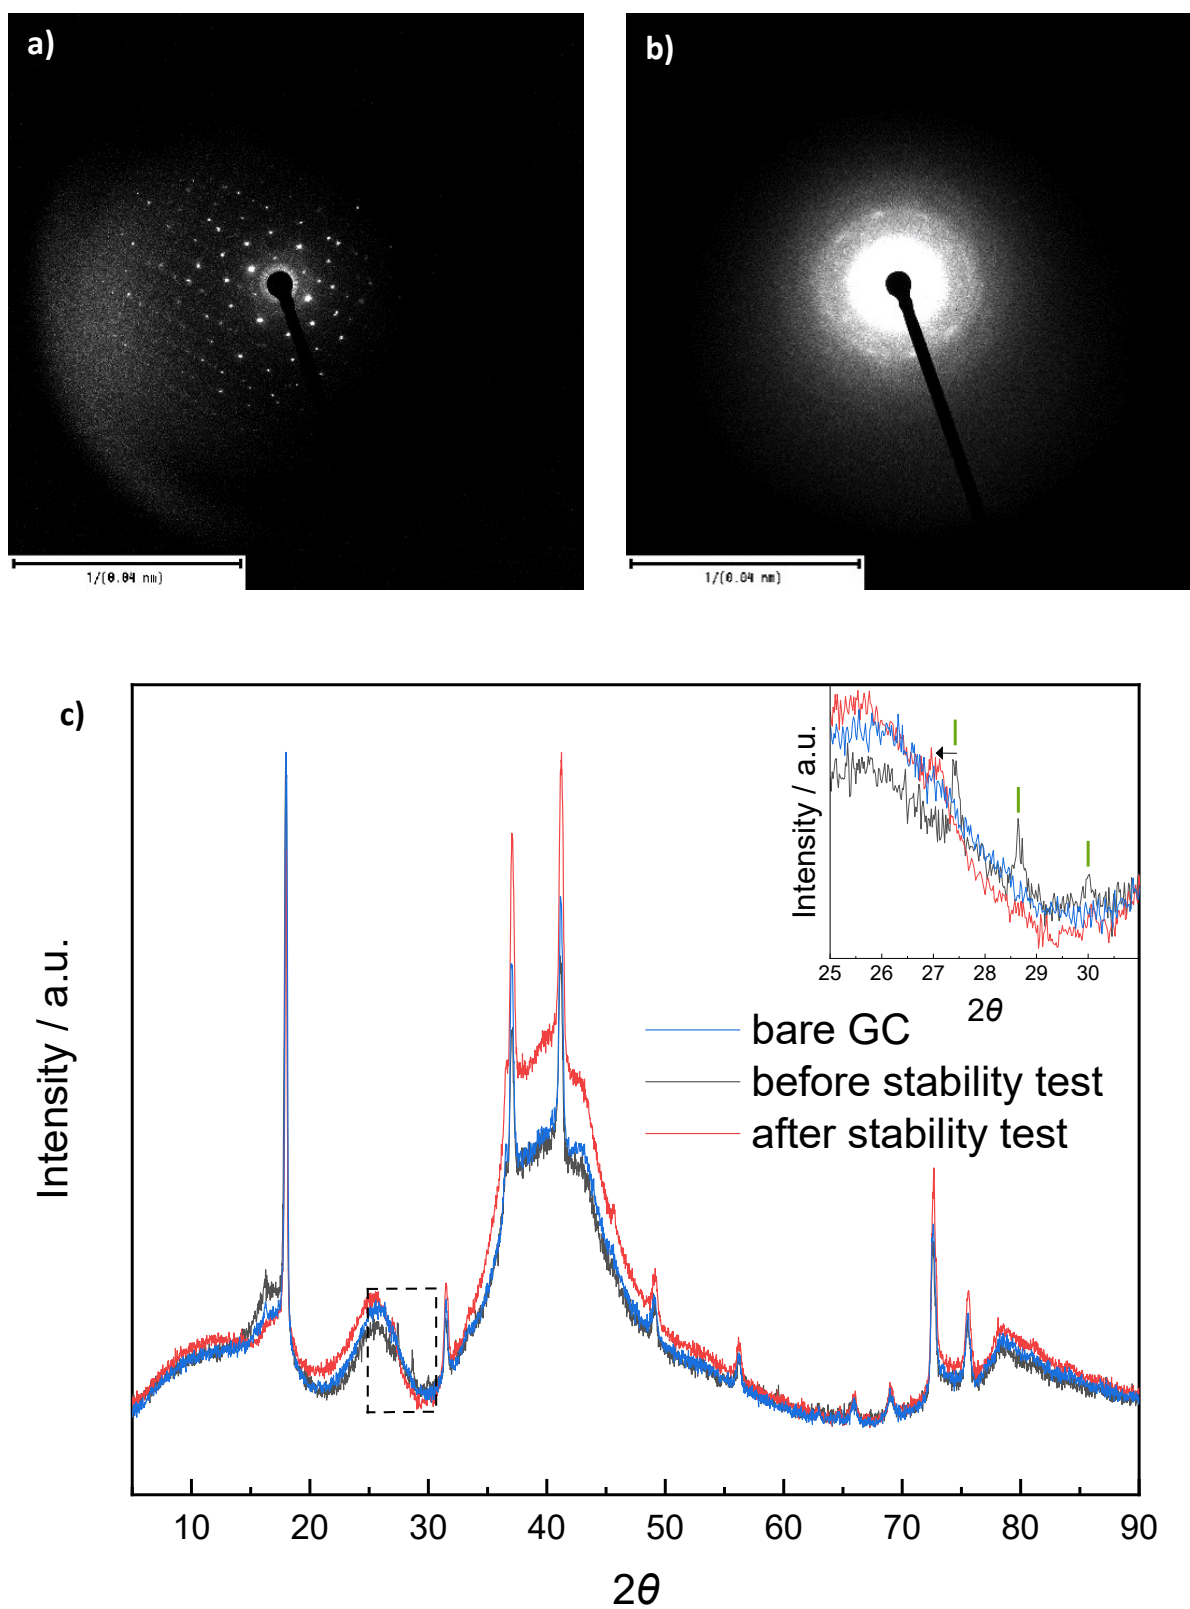

**Figure S10.** TEM/SAED diffraction patterns of exfoliated PdBi<sub>2</sub> **a)** before and **b)** after the NRR stability test. **c)** XRD patterns of bare GC and PdBi<sub>2</sub> on GC before and after the NRR stability test. The inset graph depicts the enlarged frame.

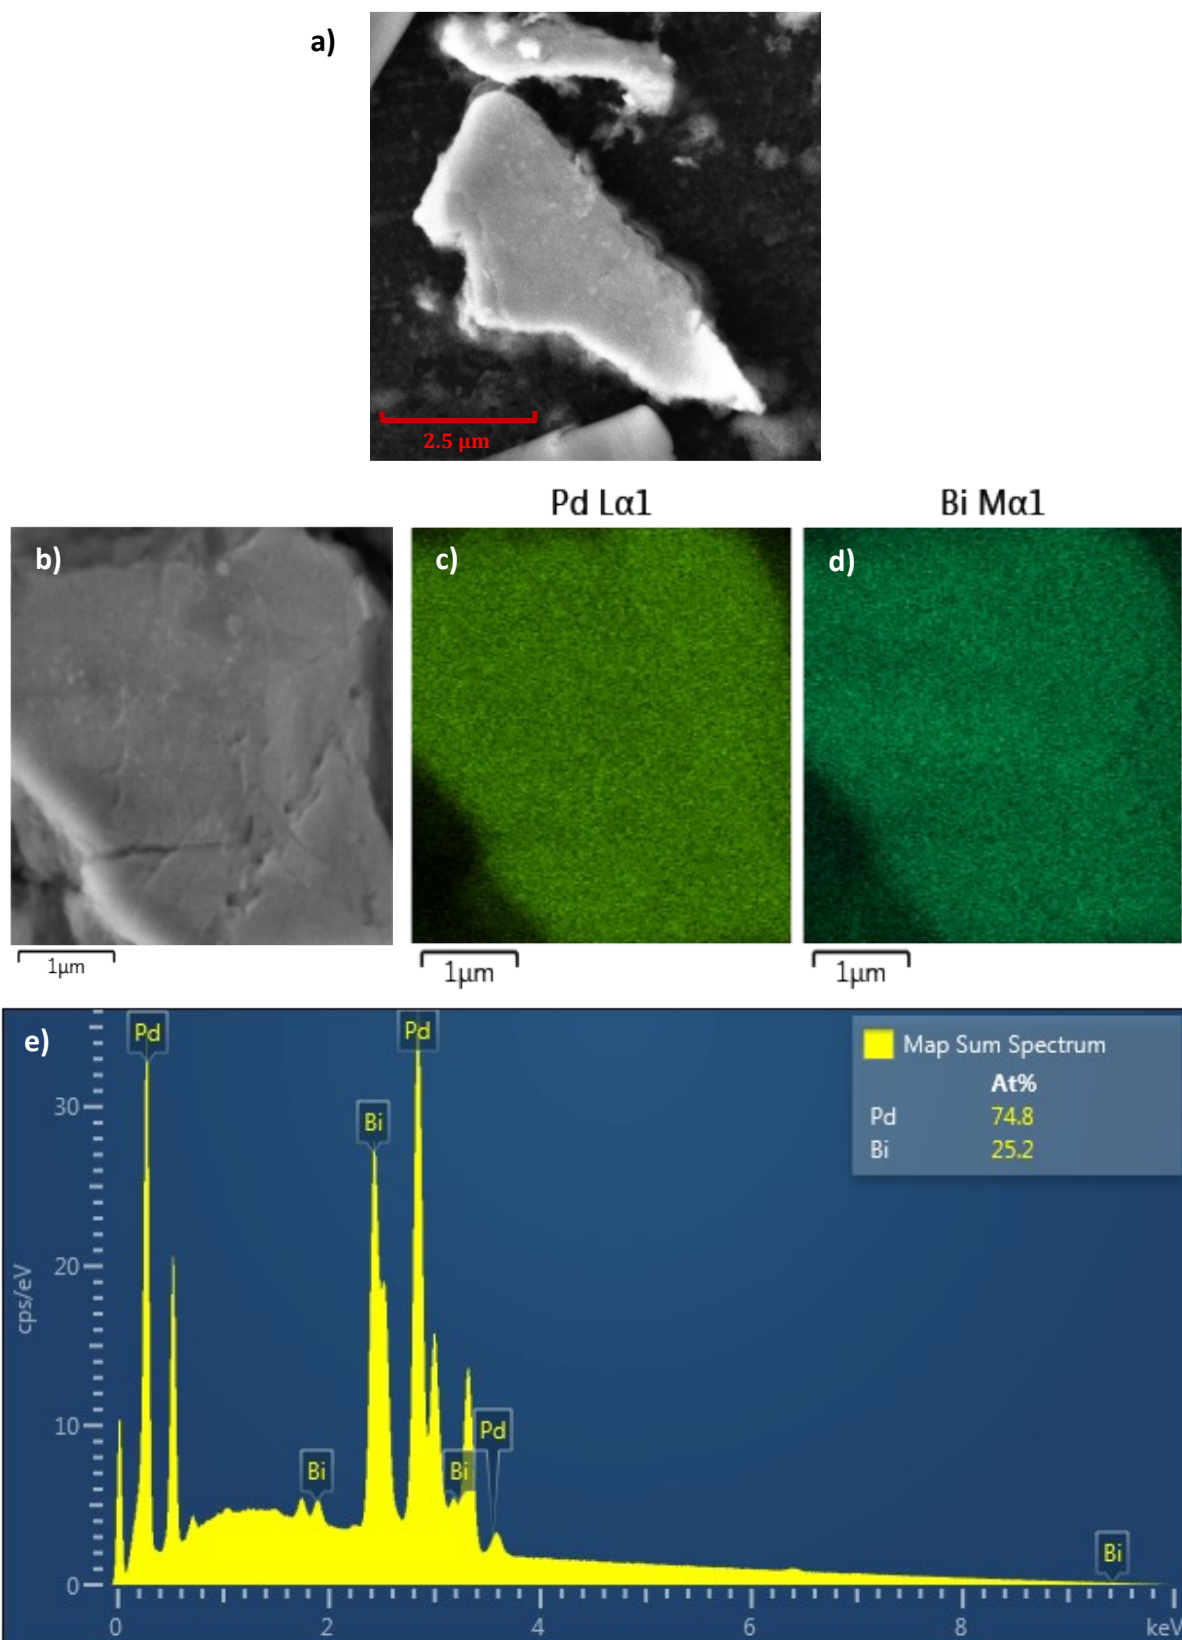

**Figure S11. a-b)** SEM images of exfoliated PdBi<sub>2</sub> after a 24-hour stability test with the corresponding EDS elemental maps of c) palladium and d) bismuth. e) EDS map spectrum of PdBi<sub>2</sub> depicting the ratio of Pd:Bi at 3:1.

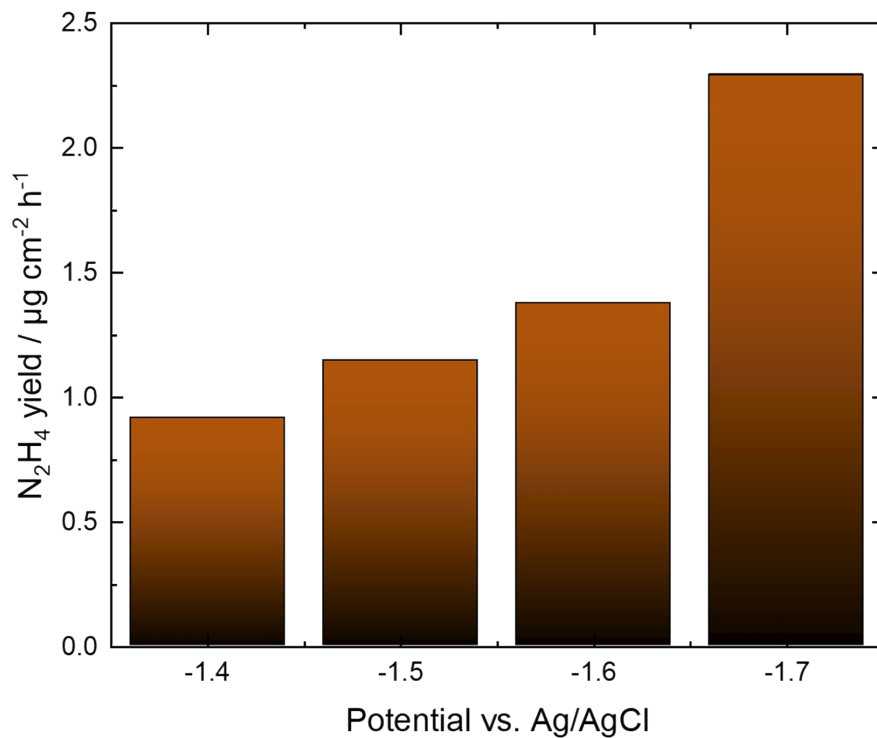

**Figure S12.**  $\text{N}_2\text{H}_4$  formation rate of exfoliated  $\text{PdBi}_2$  at different potentials.

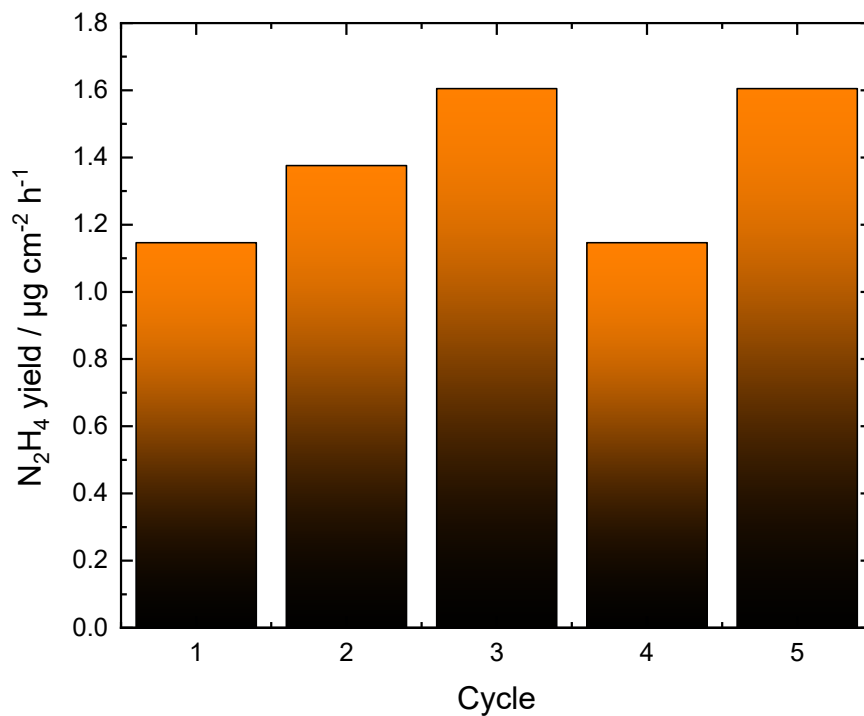

**Figure S13.**  $\text{N}_2\text{H}_4$  formation rate of dealloyed  $\text{PdBi}_2$  flakes of 2 h cycles at -1.5 V vs. Ag/AgCl.

## Construction of theoretical Pourbaix diagram for PdBi<sub>2</sub>

In this supplementary section we report the reactions involved in the construction of the theoretical Pourbaix diagram,<sup>1</sup> details are provided for the Pd-only, Bi-only, and mixed reactions. Furthermore, we also provide a set of tables that report on DFT formation energies and the experimentally motivated corrections to those energies.

For reactions involving Pd-based reagents, we establish the Pd<sup>2+</sup> ion as the standard reference for the calculation of reaction free energies. Thus, we consider the following reactions:

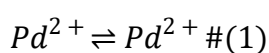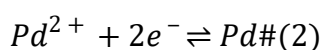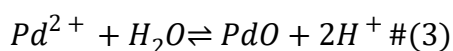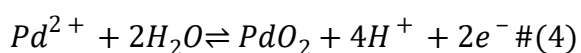

Similarly, we adopt the Bi<sup>3+</sup> ion as a standard reference for calculation of the free energy in reactions involving Bi-based reagents. These reactions are as follows:

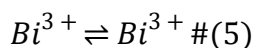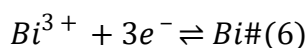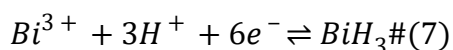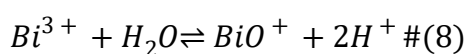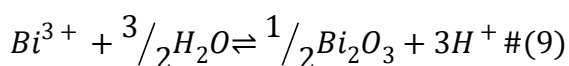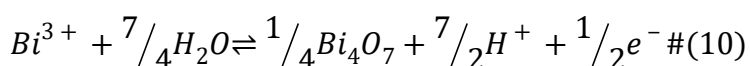

A two metals diagram was constructed following the procedure outlined in the work of Cubicciotti, to this end the Pd metal was chosen as the primary component. Assuming that each

---

<sup>1</sup>K.A. Persson, B. Waldwick, P. Lazic and G. Ceder, *Phys. Rev. B*, 2012, **85**, 235438



stable Bi species exhibits a constant activity, the reactions considered for the formation of PdBi<sub>2</sub> are:

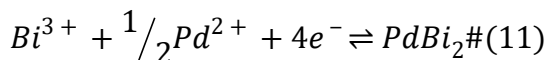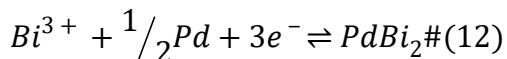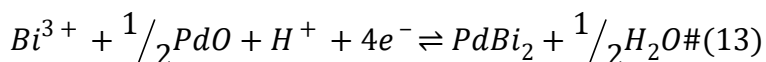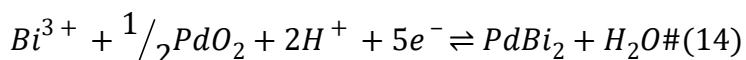

The theoretical free energy of formation ( $\Delta G_f^{DFT}$ ), computed at the PBE-SOC level of theory for each of the solid-state species are reported in the following table:

**Table S5.** Theoretical free energy of formation of each of the solid species considered in the construction of the Pourbaix diagram.

| Solid                          | $\Delta G_f^{DFT}$ (eV) |
|--------------------------------|-------------------------|
| PdBi <sub>2</sub>              | -0.760                  |
| PdO                            | -1.177                  |
| PdO <sub>2</sub>               | -0.255                  |
| Pd                             | 0.000                   |
| Bi <sub>2</sub> O <sub>3</sub> | -5.232                  |
| Bi <sub>4</sub> O <sub>7</sub> | -10.511                 |
| Bi                             | 0.000                   |

The corrections applied to the experimental ion chemical potentials based on the computed formation free energies was -0.098 eV for Bi<sup>3+</sup> and BiO<sup>+</sup> ions and -0.513 eV for the Pd<sup>2+</sup> ion.<sup>2</sup>

---

<sup>2</sup> M. Pourbaix, Atlas of Electrochemical Equilibria in Aqueous Solutions; 2nd Ed.: National Association of Corrosion Engineers, Houston, Texas, **1974**
